# Supplementary material for: Genetic- and diet-induced ω-3 fatty acid enrichment enhances TRPV4-mediated vasodilation in mice
Source: PubMed Central journal article supplement — Cell Rep. Author manuscript; Available in PMC 2022 Sep 22. (PMC9498980; doi:10.1016/j.celrep.2022.111306), 2022-09-06
Supplement: NIHMS1834787-supplement-1.pdf [file NIHMS1834787-supplement-1.pdf]

**Cell Reports, Volume 40**

**Supplemental information**

**Genetic- and diet-induced  $\omega$ -3 fatty acid  
enrichment enhances TRPV4-mediated vasodilation  
in mice**

**Rebeca Caires, Tessa A.C. Garrud, Luis O. Romero, Carlos Fernández-Peña, Valeria Vásquez, Jonathan H. Jaggar, and Julio F. Cordero-Morales**

Supplementary Figure S1

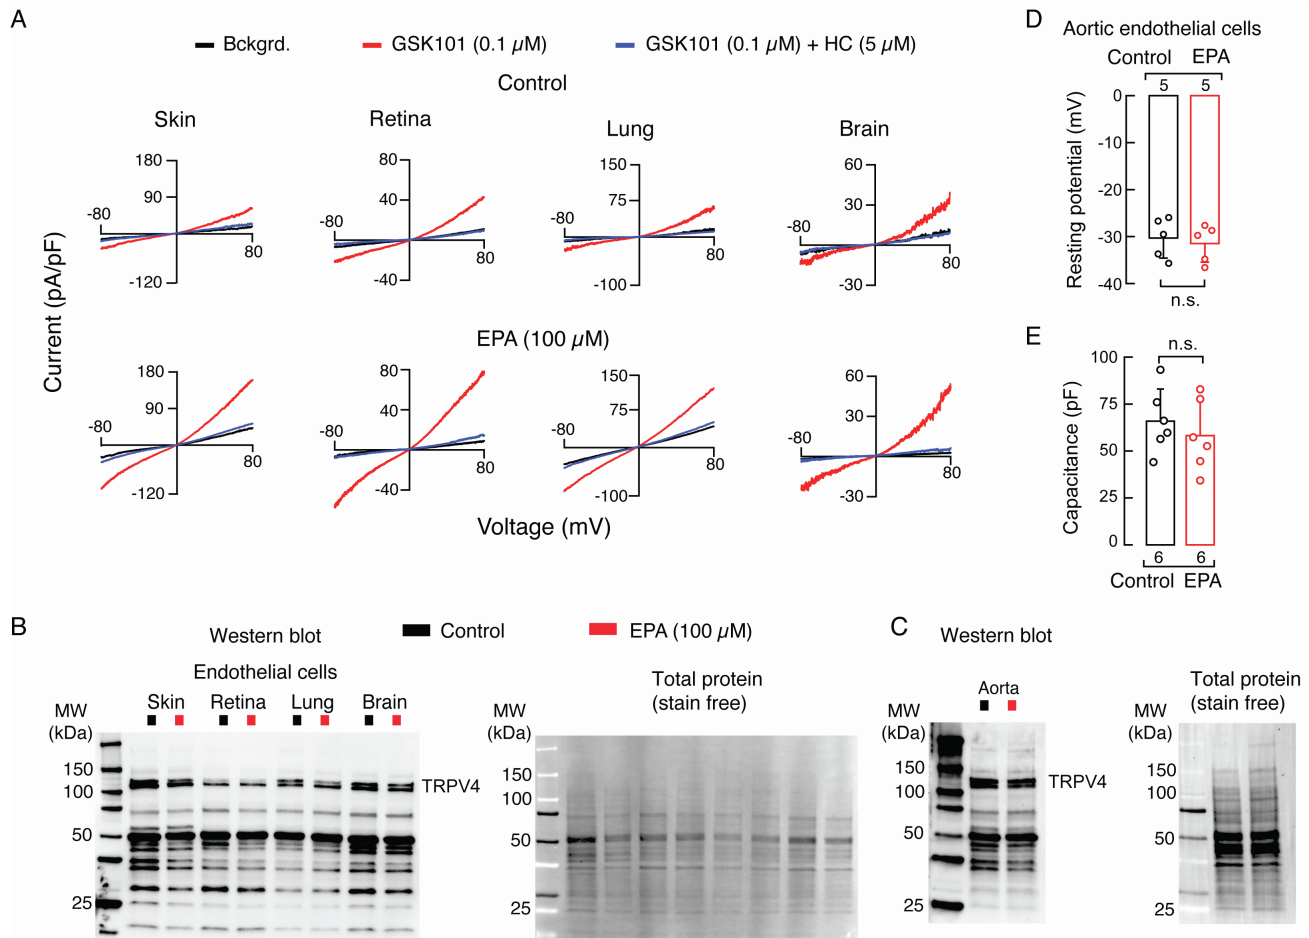

**Figure S1. Related to Figure 1. EPA supplementation enhances TRPV4 activity in human microvascular endothelial cells from the skin, lung, brain, and retina.**

(A) Representative current-voltage relationships determined by whole-cell patch-clamp recordings of control (top) and EPA (bottom)-treated human vascular endothelial cells, from skin, retina, lung, and brain, challenged with GSK101 (0.1  $\mu$ M, TRPV4 agonist) and GSK101 (0.1  $\mu$ M) + HC067047 (HC, TRPV4 antagonist; 5  $\mu$ M). Bckgrd. indicates background currents. (B) Left: Representative western blots (anti-TRPV4) of the membrane fractions of control and EPA (100  $\mu$ M)-treated endothelial cells from skin, retina, lung, and brain. Right: Representative Stain-Free<sup>TM</sup> gels (Bio-Rad) of the total chemically labeled proteins of the membrane fractions from control and EPA (100  $\mu$ M)-treated endothelial cells from skin, retina, lung, and brain. (C) Left: Representative western blots (anti-TRPV4) of the membrane fractions of control and EPA (100  $\mu$ M)-treated endothelial cells from aorta. Right: Representative Stain-Free<sup>TM</sup> gels (Bio-Rad) of the total chemically labeled proteins of the membrane fractions from control and EPA (100  $\mu$ M)-treated endothelial cells from aorta. (D) Membrane potential values were recorded just after the whole-cell configuration was achieved in control and EPA (100  $\mu$ M)-treated aortic endothelial cells. Two-tailed unpaired *t*-test. (E) Membrane capacitance of control and EPA (100  $\mu$ M)-treated aortic endothelial cells. Two-tailed unpaired *t*-test. n.s. indicates values not significantly different from the control. n is indicated in each panel.

## Supplementary Figure S2

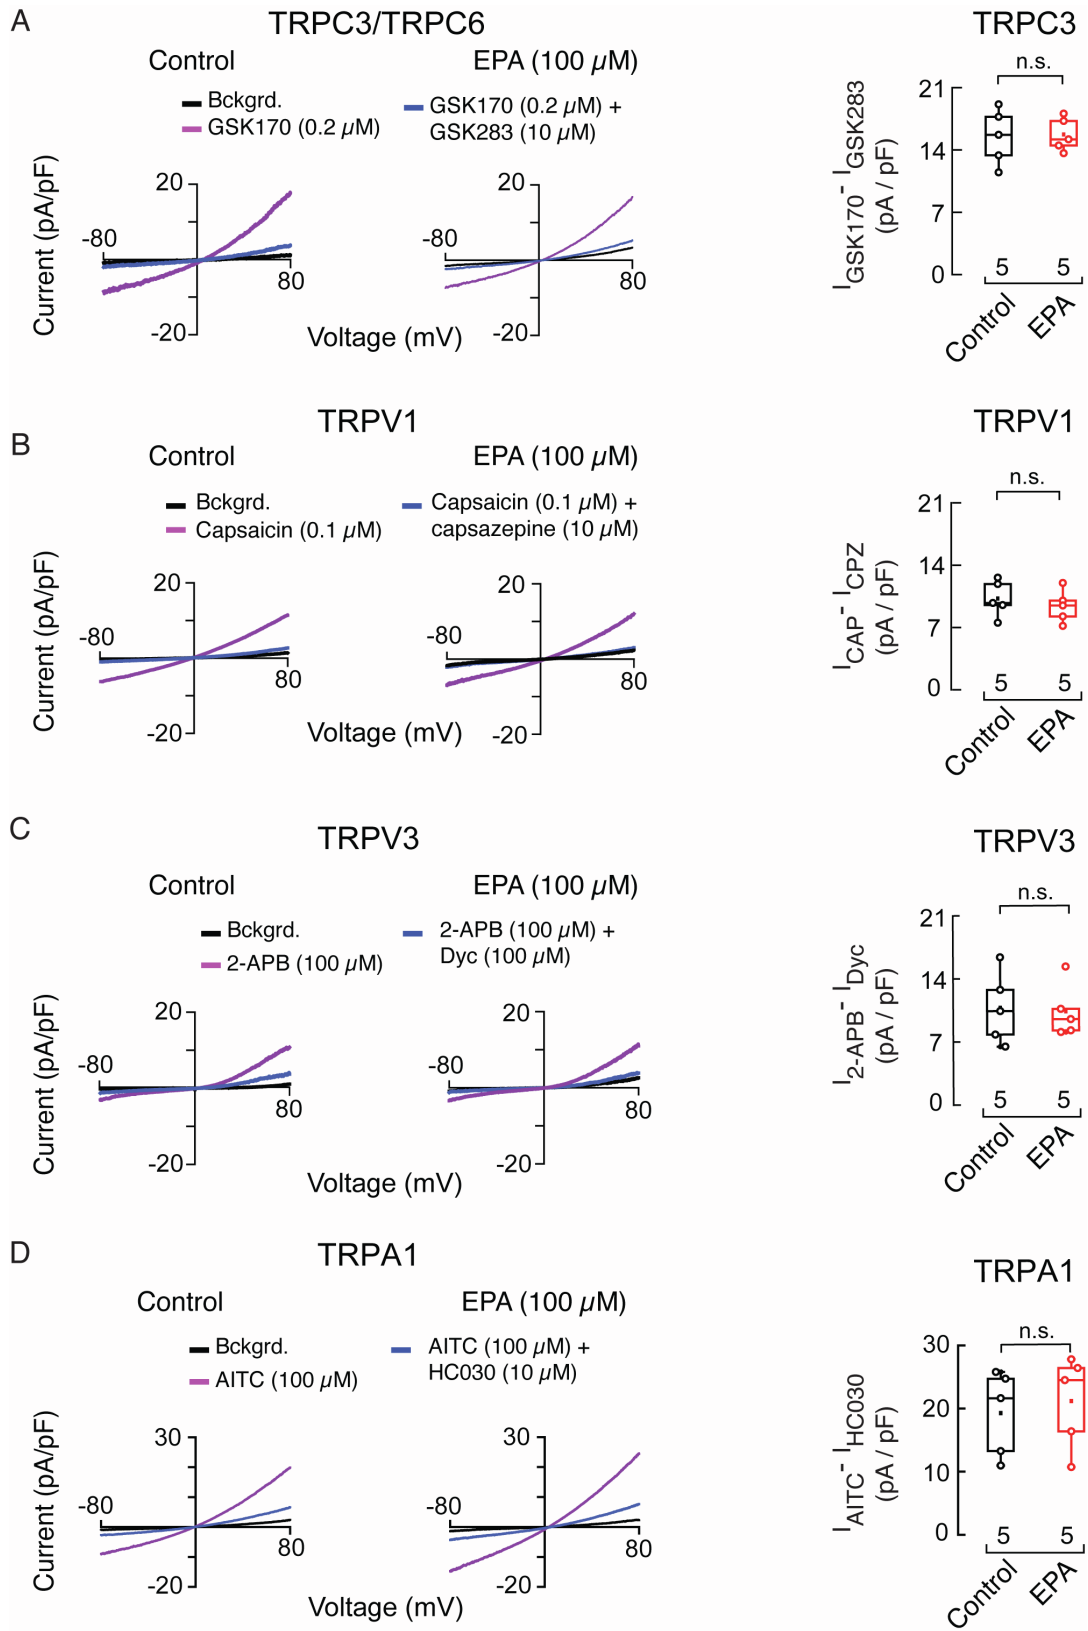

**Figure S2. Related to Figure 1. Effect of EPA supplementation on other TRP channels.**

(A) Representative current-voltage relationships determined by whole-cell patch-clamp recordings of control and EPA (100  $\mu$ M)-treated aortic endothelial cells challenged with GSK170 (GSK1702934A; TRPC3/TRPC6 agonist; 0.2  $\mu$ M) and GSK170 (0.2  $\mu$ M) + GSK283 (GSK2833503A; TRPC3/TRPC6 antagonist 10  $\mu$ M). Bckgrd. indicates background currents. Boxplots show mean (square), median (bisecting line), bounds of box (75<sup>th</sup> to 25<sup>th</sup> percentiles), outlier range with 1.5 coefficient (whiskers), and data points of TRPC3 currents ( $(I_{\text{GSK170}} - I_{\text{GSK283}})$  pA/pF) obtained by whole-cell patch clamp recordings (+80 mV) of control and EPA-treated endothelial cells from aorta. (B) Representative current-voltage relationships, determined by whole-cell patch-clamp recordings, of control and EPA (100  $\mu$ M)-treated aortic endothelial cells challenged with capsaicin (CAP; TRPV1 agonist; 0.1  $\mu$ M) and CAP (0.1  $\mu$ M) + capsazepine (CPZ; TRPV1 antagonist 10  $\mu$ M). Bckgrd. indicates background currents. Boxplots show mean (square), median (bisecting line), bounds of box (75<sup>th</sup> to 25<sup>th</sup> percentiles), outlier range with 1.5 coefficient (whiskers), and data points of TRPV1 currents ( $(I_{\text{CAP}} - I_{\text{CPZ}})$  pA/pF) obtained by whole-cell patch clamp recordings (+80 mV) of control and EPA-treated endothelial cells from aorta. (C) Representative current-voltage relationships, determined by whole-cell patch-clamp recordings, of control and EPA (100  $\mu$ M)-treated aortic endothelial cells challenged with 2-aminoethoxydiphenyl borate (2-APB; TRPV3 agonist; 100  $\mu$ M) and 2-APB (100  $\mu$ M) + dyclonine (Dyc; TRPV3 antagonist 100  $\mu$ M). Bckgrd. indicates background currents. Boxplots show mean (square), median (bisecting line), bounds of box (75<sup>th</sup> to 25<sup>th</sup> percentiles), outlier range with 1.5 coefficient (whiskers), and data points of TRPV3 currents ( $(I_{2\text{-APB}} - I_{\text{Dyc}})$  pA/pF) obtained by whole-cell patch clamp recordings (+80 mV) of control and EPA-treated endothelial cells from aorta. (D) Representative current-voltage relationships, determined by whole-cell patch-clamp recordings, of control and EPA (100  $\mu$ M)-treated aortic endothelial cells challenged with allyl isothiocyanate (AITC; TRPA1 agonist; 100  $\mu$ M) and AITC (100  $\mu$ M) + HC030 (HC030031; TRPA1 antagonist 10  $\mu$ M). Bckgrd. indicates background currents. Boxplots show mean (square), median (bisecting line), bounds of box (75<sup>th</sup> to 25<sup>th</sup> percentiles), outlier range with 1.5 coefficient (whiskers), and data points of TRPA1 currents ( $(I_{\text{AITC}} - I_{\text{HC030}})$  pA/pF) obtained by whole-cell patch clamp recordings (+80 mV) of control and EPA-treated endothelial cells from aorta. Two-tailed unpaired *t*-test between control and supplemented cells. *n* is indicated in each panel. n.s. means not significantly different.

### Supplementary Figure 3

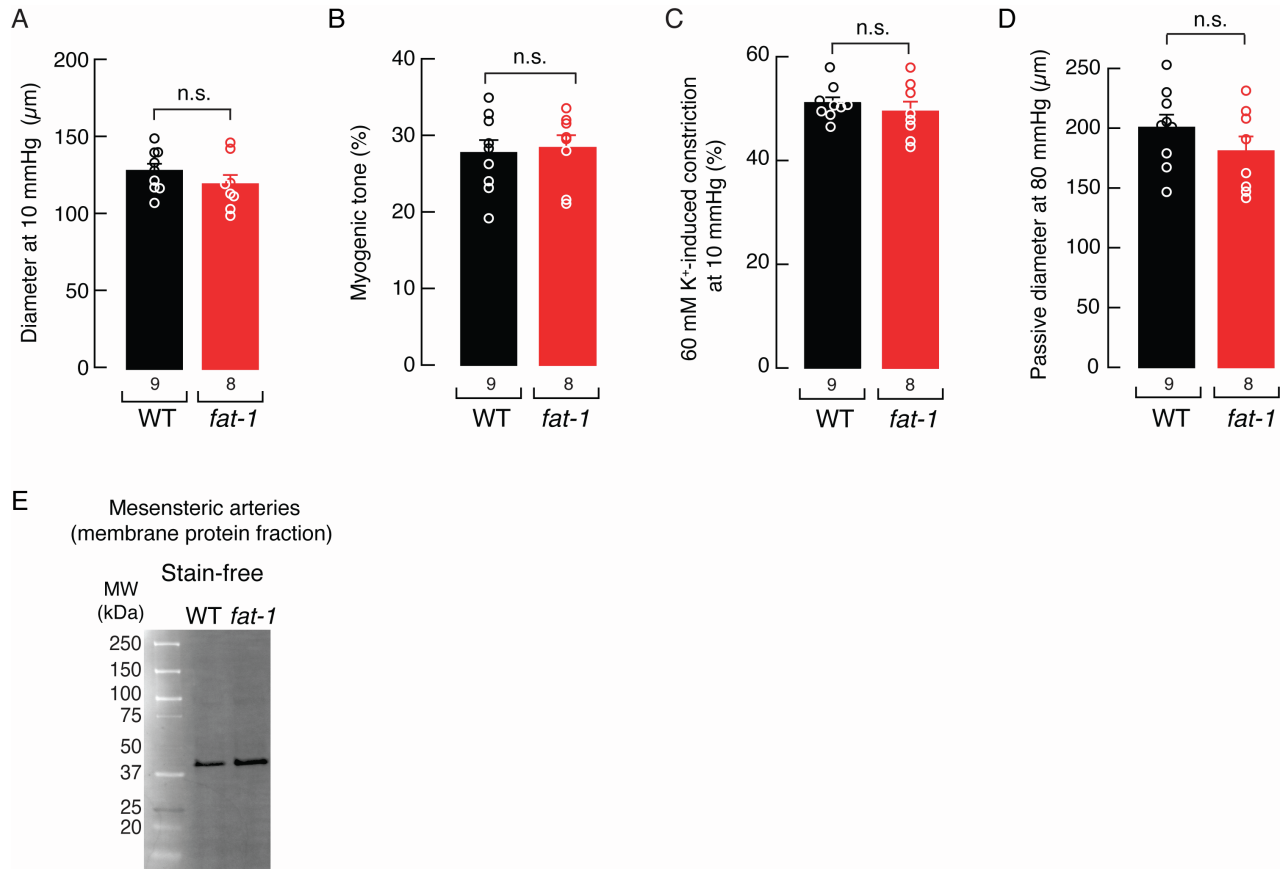

**Figure S3. Related to Figure 3. *fat-1* mesenteric arteries feature normal physical parameters.**

Bar graphs show mean  $\pm$  SEM for active diameter at 10 mm Hg (**A**), myogenic tone (**B**), 60 mM K<sup>+</sup>-induced constriction at 10 mmHg (**C**), and passive diameter at 80 mmHg (**D**), in mesenteric arteries of WT and *fat-1* mice. n is denoted below the bars. Two-tailed unpaired *t*-test. n.s. indicates values not significantly different from WT. (**E**) Representative Stain-Free<sup>TM</sup> gel (Bio-Rad) of the total chemically labeled proteins of the membrane fractions from the mesenteric arteries of WT and *fat-1* mice.

## Supplementary Figure 4

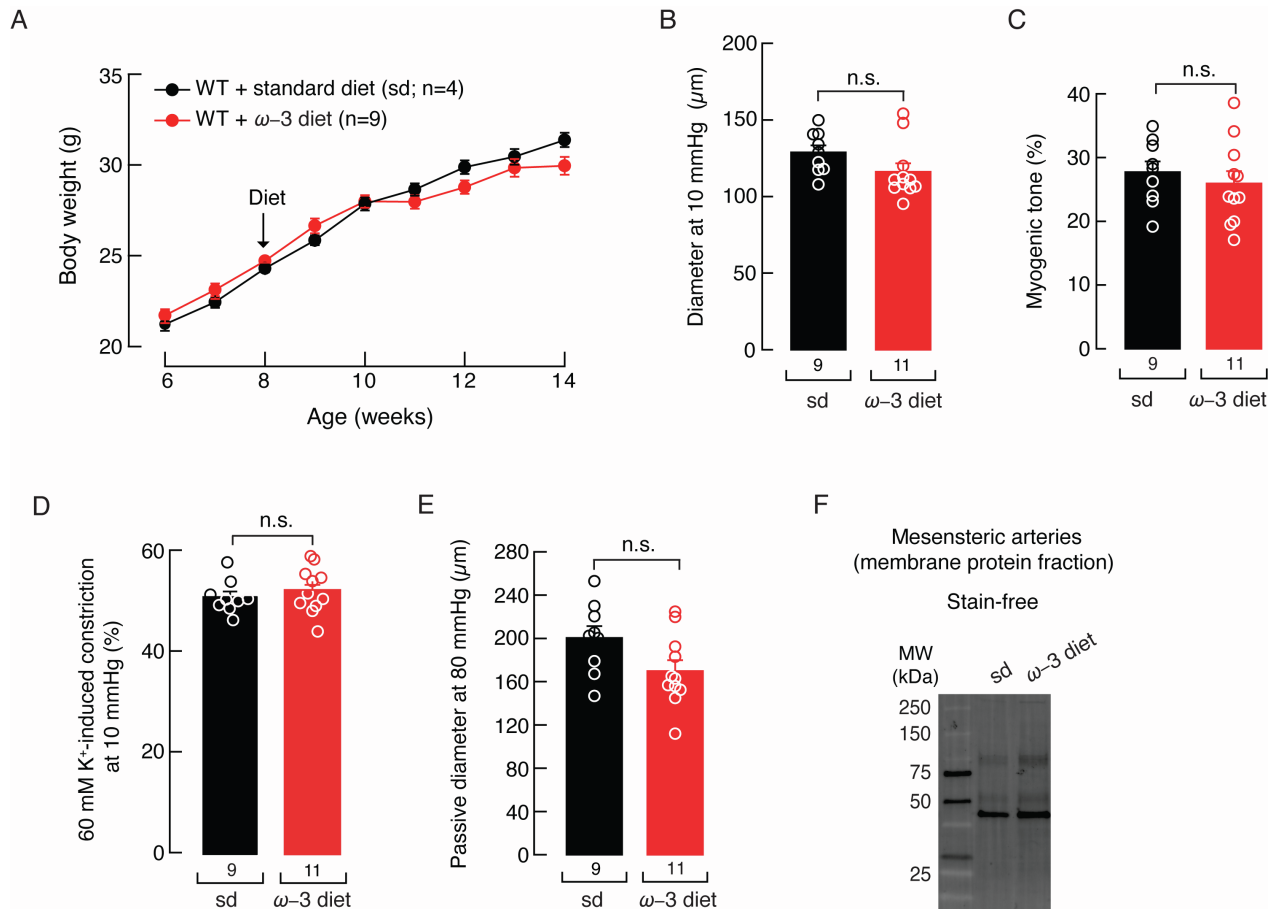

**Figure S4. Related to Figure 4. Mesenteric arteries of mice fed with an  $\omega$ -3 fatty acid-enriched diet feature normal physical parameters.**

(A) Body weight measurements were recorded every week at similar times from mice of 6 to 14 weeks of age. The arrow indicates the beginning of the  $\omega$ -3 fatty acid-enriched diet. Symbols denote the mean  $\pm$  SEM. Bar graphs show mean  $\pm$  SEM for active diameter at 10 mm Hg (B), myogenic tone (C), 60 mM K<sup>+</sup>-induced constriction at 10 mm Hg (D), and passive diameter at 80 mm Hg (E), in mesenteric arteries of WT mice fed with standard or  $\omega$ -3 fatty acid-enriched diets. n is denoted below the bars. Two-tailed unpaired *t* test. n.s. indicates values not significantly different from the standard diet. (F) Representative Stain-Free™ gel (Bio-Rad) of the total chemically labeled proteins of the membrane fractions from the mesenteric arteries of WT mice fed with standard or  $\omega$ -3 fatty acid-enriched diets.

### Supplementary Figure 5

A

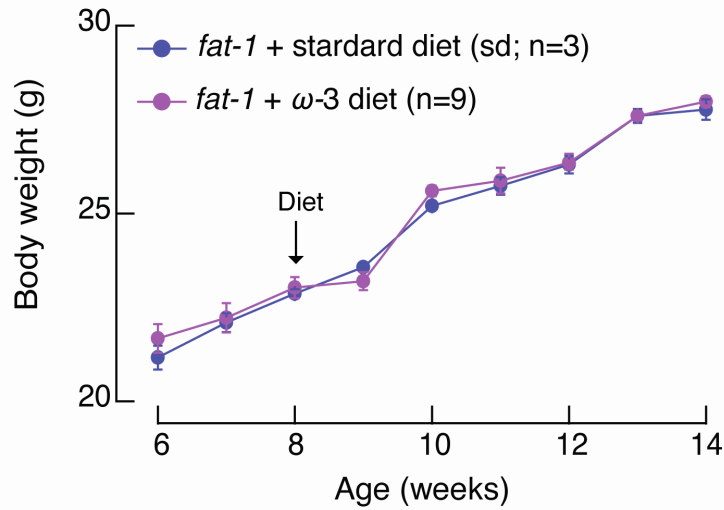

B

Full-length  
rat TRPV4 1 MADPGDGPRAAPGDVAEPPGDESGTSGGEAFPLSSLANLFEFEGEGSSLSFVDASRPAGPGDGRPNLRMK 70  
 $\Delta$ 186 -----  
71 FQGAFRKGVPNPIDLLESTLYESSVVPKPKAPMDSLFDYGTyrRHPSDN **KRWRRK** VVEKQPQSPKAPAP 140  
-----  
141 QPPPILKVFNRPIILFDIVSRGSTADLDGLLSYLLTHKKRLTDEEFRE<sup>186</sup>PSTGKTC LPKALLNLSNGRNDTI 210  
-----  
MEPSTGKTC LPKALLNLSNGRNDTI  
211 PVLLDIAERTGNMREFINSPFRDIYYRQTALHIAIERRCKHYVELLVAQGADVHAQARGRFFQPKDEGG 280  
PVLLDIAERTGNMREFINSPFRDIYYRQTALHIAIERRCKHYVELLVAQGADVHAQARGRFFQPKDEGG  
281 YFYFGELPLSLAACTNQPHIVNYLTENPHKKADMRRQDSRGNTVLHALVAIADNTRENTK<sup>871</sup>FVK..... 871  
YFYFGELPLSLAACTNQPHIVNYLTENPHKKADMRRQDSRGNTVLHALVAIADNTRENTK<sup>871</sup>FVK.....

**Figure S5. Related to Figures 5 and 7. *fat-1* mice body weight in standard or  $\omega$ -3 fatty acid-enriched diets and TRPV4 constructs protein sequences.**

(A) Body weight measurements were recorded every week at similar times from mice of 6 to 14 weeks of age. The arrow indicates the beginning of the  $\omega$ -3 fatty acid-enriched diet. Symbols denote the mean  $\pm$  SEM. (B) Protein sequences highlighting the first 186 amino acid residues deleted from the TRPV4 terminus in the  $\Delta$ 186 construct and the five positively charged residues (in box) mutated to alanine.
